# Supplementary material for: Chondroitin Sulfate Disaccharides, a Serum Marker for Primary Serous Epithelial Ovarian Cancer
Source: Diagnostics (Basel). 2021 Jun 23;11(7):1143. doi: 10.3390/diagnostics11071143 (PMC8304809; doi:10.3390/diagnostics11071143)
Supplement: Supplementary file 1 [file diagnostics-11-01143-s001.zip › diagnostics-1267340-supplementary.pdf]

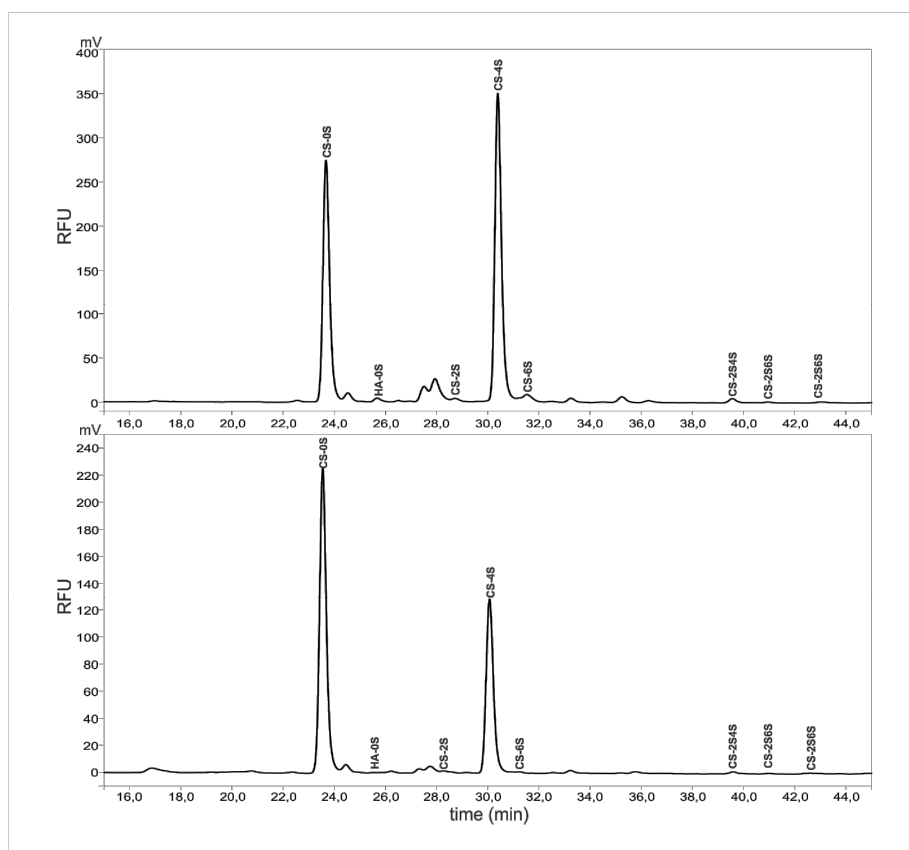

**Figure S1.** Representative HPLC chromatograms of 2AB-labeled CS-disaccharides isolated from an ovarian cancer patient (upper panel) and a healthy control (lower panel).

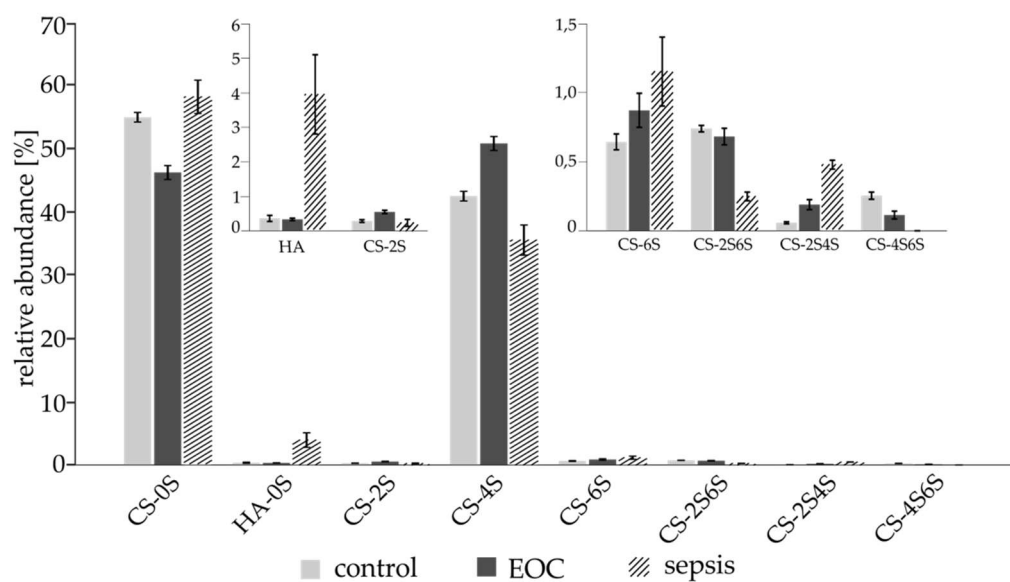

**Figure S2.** (a) Mean and 95% confidence intervals [1] of relative areas of CS disaccharides released from human serum measured by HPLC coupled to fluorescence detection. (b) Enlarged view of the low abundant CS disaccharides. S indicates sulfate and the preceding digit indicates the sulfation position.

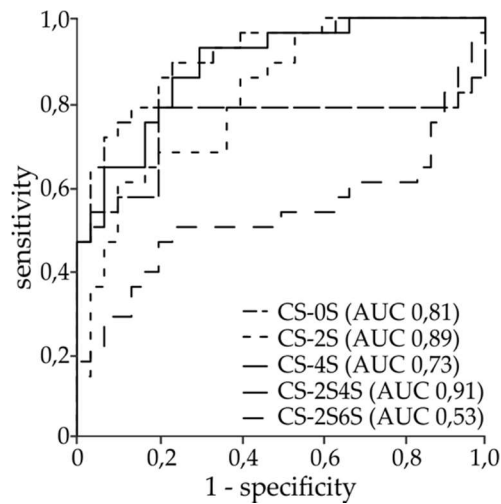

**Figure S3.** ROC curves of the disaccharides that were of statistical significance in this study.

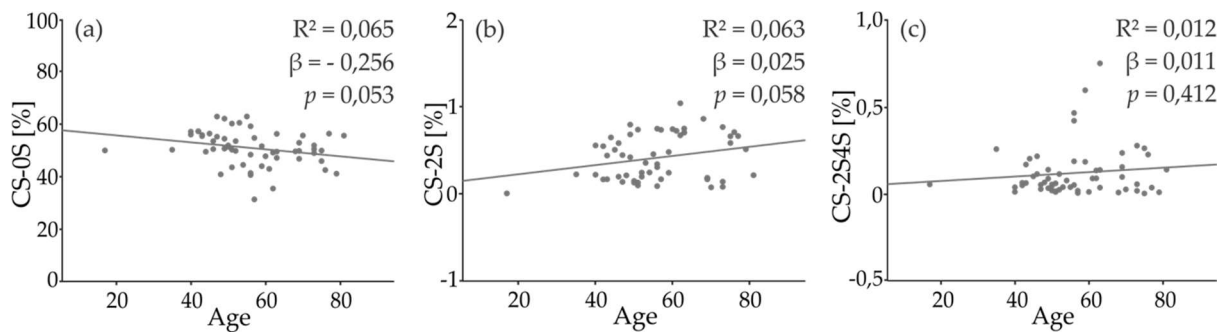

**Figure S4.** Association between disaccharide CS-0S (a), CS-2S (b) and CS-4S (c) (Y-axis) and age of the whole patient cohort (X-axis). Descriptive statistics are in terms of R<sup>2</sup> (coefficient of determination), b (regression b coefficient) and p (p-values).

## Supplementary Tables

**Table S1.** CS-disaccharides were released from a healthy control, labeled with 2-AB and measured by HPLC in triplicate. Mean, standard deviation and coefficient of variation are presented in the Table for each CS disaccharide.

| Composition | Mean   | Standard Deviation | Coefficient of variation (%) |
|-------------|--------|--------------------|------------------------------|
| CS-0S       | 38,375 | 0,034              | 0,09                         |
| HA          | 0,369  | 0,009              | 2,30                         |
| CS-2S       | 1,731  | 0,037              | 2,16                         |
| CS-4S       | 54,728 | 0,077              | 0,14                         |
| CS-6S       | 1,742  | 0,083              | 4,74                         |
| CS-2S6S     | 1,857  | 0,023              | 1,25                         |
| CS-2S4S     | 0,227  | 0,010              | 4,49                         |
| CS-4S6S     | 0,972  | 0,010              | 1,04                         |

**Table S2.** CS-disaccharides were released from a healthy control in triplicate, labeled with 2-AB and measured by HPLC. Mean, standard deviation and coefficient of variation are presented in the Table for each CS disaccharide.

| Composition | Mean   | Standard Deviation | Coefficient of variation (%) |
|-------------|--------|--------------------|------------------------------|
| CS-0S       | 39,267 | 0,777              | 1,98                         |
| HA          | 0,343  | 0,004              | 1,24                         |
| CS-2S       | 1,744  | 0,148              | 8,47                         |
| CS-4S       | 54,046 | 0,708              | 1,31                         |
| CS-6S       | 1,588  | 0,128              | 8,09                         |
| CS-2S6S     | 1,814  | 0,093              | 5,15                         |
| CS-2S4S     | 0,216  | 0,015              | 6,95                         |
| CS-4S6S     | 0,981  | 0,063              | 6,37                         |
